# Supplementary material
Source: HighWire-hosted journal article supplement (https://diabetes.diabetesjournals.org/content/suppl/2007/07/23/db06-1465)

○ Rosi+RA

● PGC-1 $\alpha$ ◐ PGC-1 $\alpha$  +Rosi+RA**Upregulated genes****Downregulated genes**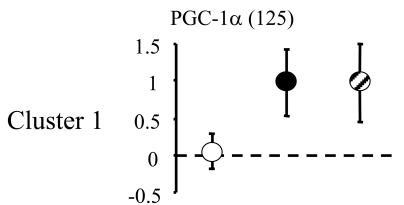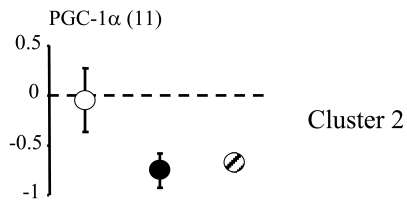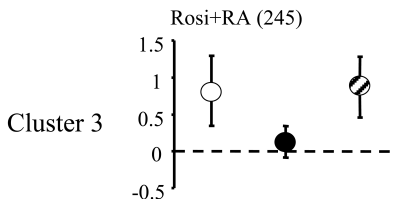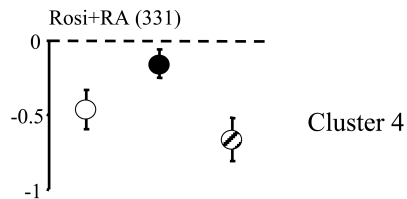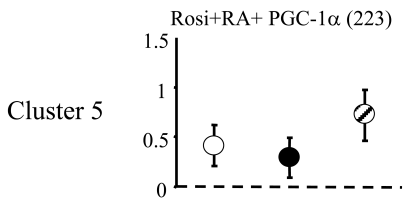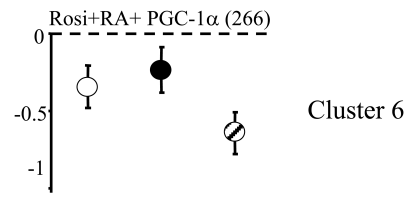

Supplement: db061465OnlineSupFig1.pdf [file db061465OnlineSupFig1.pdf]

**A**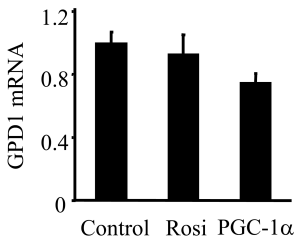**B**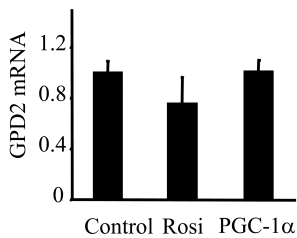**C**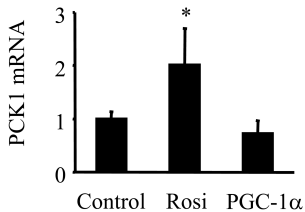**D**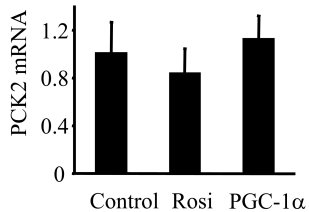

Supplement: db061465OnlineSupFig3.pdf [file db061465OnlineSupFig3.pdf]
